# Supplementary material for: 4-Octyl itaconate inhibits aerobic glycolysis by targeting GAPDH to exert anti-inflammatory effects
Source: Springer Nature journal article supplement (doi:10.1038/s41467-019-13078-5), 2019-11-08
Supplement: 41467_2019_13078_MOESM1_ESM.pdf [file 41467_2019_13078_MOESM1_ESM.pdf]

## **Supplementary Information**

### **4-Octyl itaconate inhibits aerobic glycolysis by targeting GAPDH to exert anti-inflammatory effects**

Liao et al.

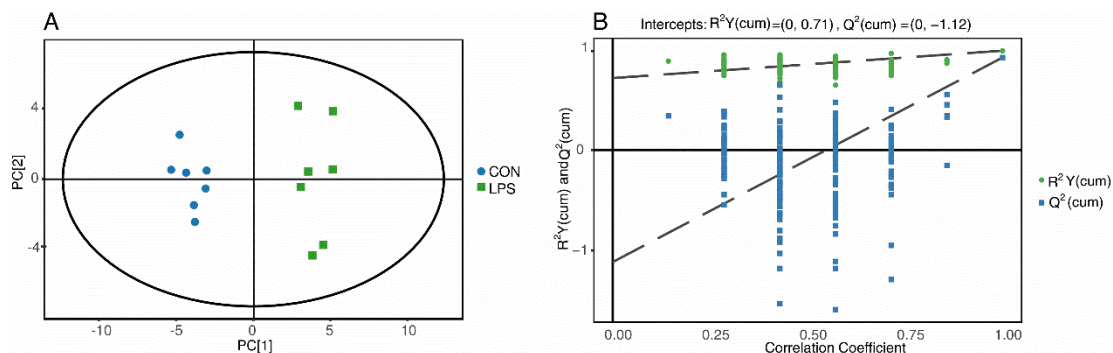

Supplementary Fig. 1 LC-MS/MS metabolomics of control (CON) and LPS-stimulated (LPS) groups. (A), Score plots of the principal component analysis (PCA) model differentiated metabolites of control (CON) and LPS-stimulated (LPS) RAW264.7 macrophages. (B), Scatter plots of the statistical validations obtained by 200 permutation tests for OPLS-DA analysis in RAW264.7 macrophages. Results are from seven independent experiments.

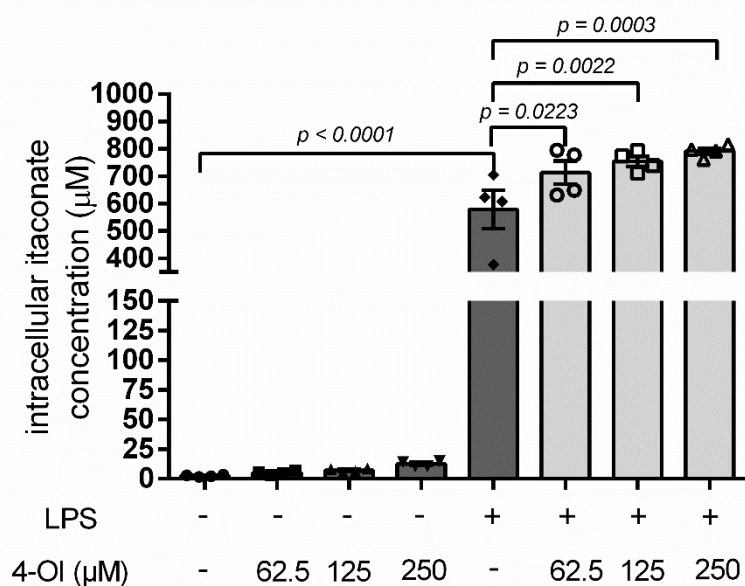

Supplementary Fig. 2 4-OI was hydrolysed to itaconate in LPS stimulated RAW264.7 macrophages. Macrophages were treated with vehicle or 4-OI at the indicated concentrations. After 3 h, cells were stimulated with or without 1 µg/mL LPS for 24 h. Itaconate levels in RAW264.7 macrophages were quantitative by LC-MS/MS. Data represent the mean ± SEM of four independent experiments. *p* values were determined by one-way ANOVA with Sidak's correction for multiple comparisons. Source data are provided as a Source Data file.

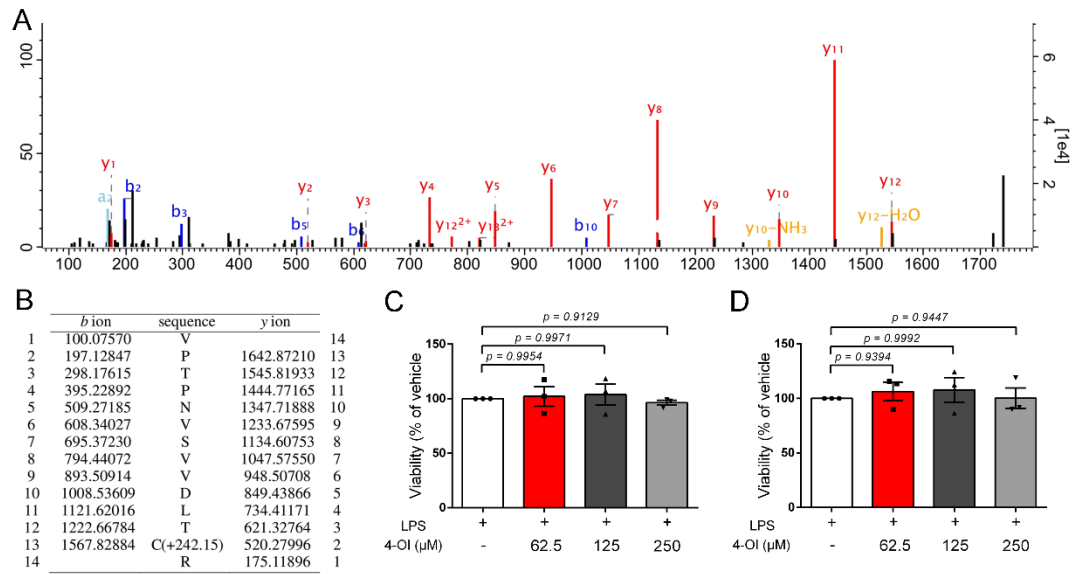

Supplementary Fig. 3 4-OI modified recombinant mouse GAPDH. (A) and (B), Representative LC-MS/MS spectra demonstrated modification of GAPDH cysteine 245 (+242.15 Da) in recombinant mouse GAPDH incubated with 4-OI (500  $\mu$ M) for 4 h at 37  $^{\circ}$ C. Da = daltons. (C) and (D), RAW264.7 macrophages (C) or BMDMs (D) were treated with 100 ng/ml or 1  $\mu$ g/ml LPS plus the indicated doses of 4-OI for 24 h. Viability was assessed by cell counting kit-8. Data represent the mean  $\pm$  SEM of three experiments performed in duplicate. The results are non-significant by one-way ANOVA with Sidak's correction for multiple comparisons. Source data are provided as a Source Data file.

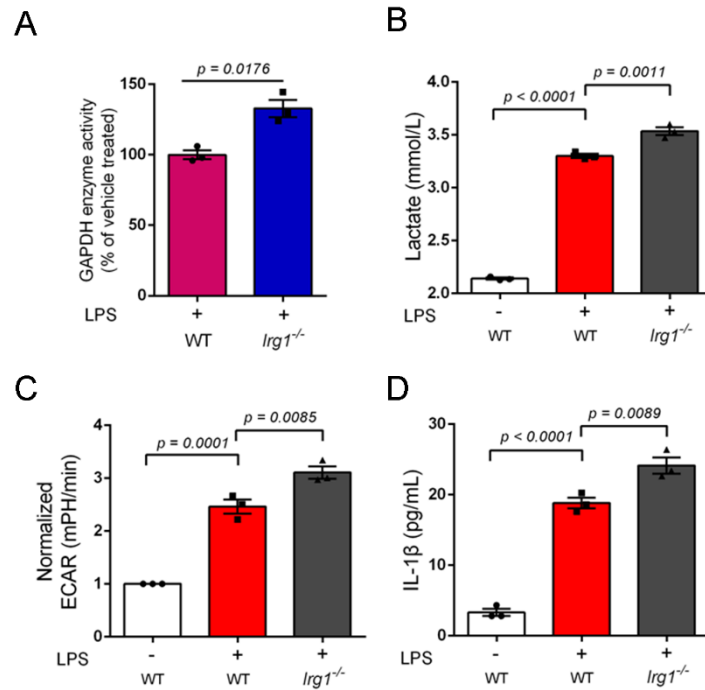

Supplementary Fig. 4 *Irg1* deficiency leads to enhanced GAPDH activity and glycolysis. WT BMDMs and *Irg1*<sup>-/-</sup> BMDMs were detected for GAPDH enzyme activity (A) after 100 ng/mL LPS stimulation for 24 h. Levels of lactate (B), ECAR (C) and IL-1β (D) were determined in WT and *Irg1*<sup>-/-</sup> BMDMs with or without LPS stimulation for 24 h. All data shown are summarized from three independent experiments. Values represent the mean ± SEM at each time point. *p* values were calculated using two-tailed Student's *t*-test or one-way ANOVA with Sidak's correction for multiple comparisons. Source data are provided as a Source Data file.

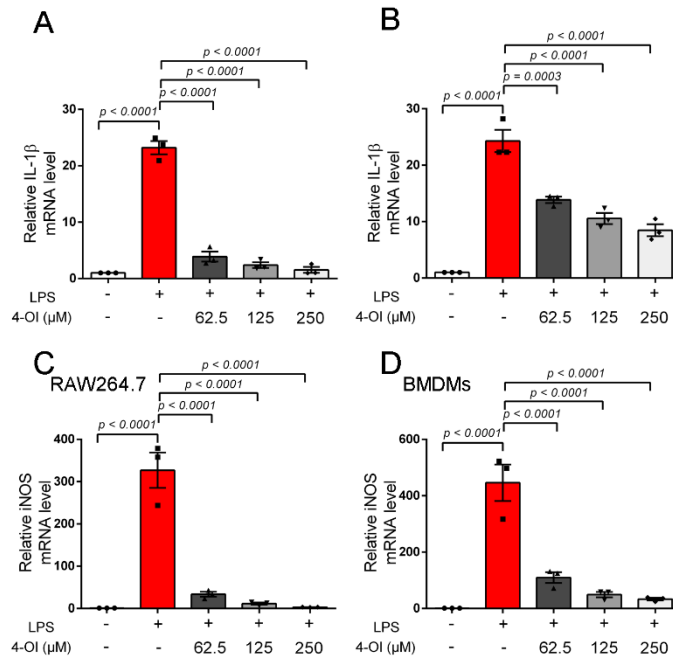

Supplementary Fig. 5 4-OI inhibited IL-1 $\beta$  and iNOS mRNA expressions. Macrophages were treated with vehicle or 4-OI at the indicated concentrations. After 3 h, cells were stimulated with LPS (1  $\mu$ g/mL or 100 ng/mL) for 24 h. (A) and (B), The mRNA levels of IL-1 $\beta$  in RAW264.7 macrophages (A) and BMDMs (B) were measured by qRT-PCR. (C) and (D), The mRNA expression of IL-1 $\beta$  in RAW264.7 macrophages (C) and BMDMs (D) was identified by qRT-PCR. Data represent the mean  $\pm$  SEM of three independent experiments. *p* values were determined by one-way ANOVA with Sidak's correction for multiple comparisons. Source data are provided as a Source Data file.

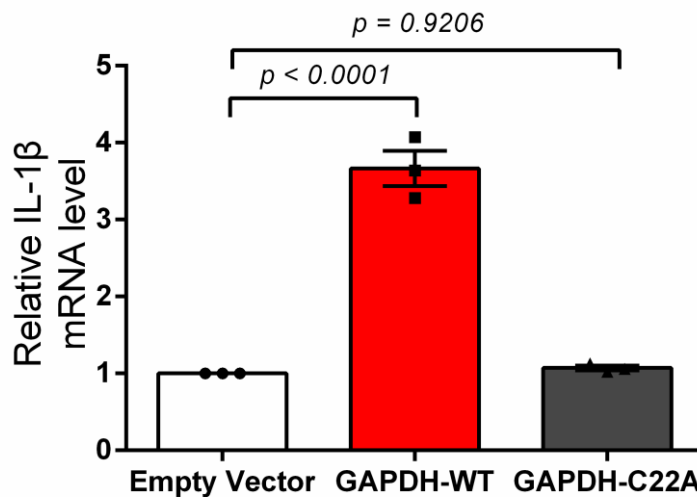

Supplementary Fig. 6 Wild-type GAPDH (GAPDH-WT) abolished the inhibitory effect of 4-OI. GAPDH-WT or the Cys-22 mutant (GAPDH-C22A) was overexpressed in RAW264.7 macrophages for 24 h, and the cells were then treated with LPS and 4-OI for 24 h, followed by measurement of IL-1 $\beta$  mRNA levels by qRT-PCR. Data represent the mean  $\pm$  SEM of three experiments. *p* values were calculated by one-way ANOVA with Sidak's correction for multiple comparisons. Source data are provided as a Source Data file.

Supplementary Table 1. The sequence of mouse GAPDH peptide

|   | <i>b</i> ion | sequence   | <i>y</i> ion |   |
|---|--------------|------------|--------------|---|
| 1 | 72.04440     | A          |              | 7 |
| 2 | 143.08152    | A          | 820.44850    | 6 |
| 3 | 256.16559    | I          | 749.41138    | 5 |
| 4 | 601.32659    | C+(242.15) | 636.32731    | 4 |
| 5 | 688.35862    | S          | 291.16631    | 3 |
| 6 | 745.38009    | G          | 204.13428    | 2 |
| 7 |              | K          | 147.11281    | 1 |

4-OI modified Cys 22 of GAPDH in RAW264.7 macrophages.

Supplementary Table 2. The sequence of mouse GAPDH peptide

|   | <i>b</i> ion | sequence   | <i>y</i> ion |   |
|---|--------------|------------|--------------|---|
| 1 | 72.04440     | A          |              | 7 |
| 2 | 143.08152    | A          | 708.32330    | 6 |
| 3 | 256.16559    | I          | 637.28618    | 5 |
| 4 | 489.20139    | C+(130.02) | 524.20211    | 4 |
| 5 | 576.23342    | S          | 291.16631    | 3 |
| 6 | 633.25489    | G          | 204.13428    | 2 |
| 7 |              | K          | 147.11281    | 1 |

Itaconate covalently modified Cys 22-containing GAPDH peptide in LPS-induced RAW264.7 macrophages.

Supplementary Table 3. The sequence of recombinant mouse GAPDH peptide

|   | <i>b</i> ion | sequence   | <i>y</i> ion |   |
|---|--------------|------------|--------------|---|
| 1 | 72.04440     | A          |              | 7 |
| 2 | 143.08152    | A          | 820.44850    | 6 |
| 3 | 256.16559    | I          | 749.41138    | 5 |
| 4 | 601.32659    | C+(242.15) | 636.32731    | 4 |
| 5 | 688.35862    | S          | 291.16631    | 3 |
| 6 | 745.38009    | G          | 204.13428    | 2 |
| 7 |              | K          | 147.11281    | 1 |

4-OI covalently modified Cys 22 of recombinant mouse GAPDH.
